# Supplementary material for: Mapping Connective Tissue Molecular Blueprints to Illuminate Human Keratinized and Non-Keratinized Oral Mucosa
Source: Research Square preprint supplement (doi:10.21203/rs.3.rs-5368489/v1), 2024-11-14
Supplement: Supplementary file 1 [file 41a661ed269215cb7768a2b5.docx]

**Table S1**.Primer sequences for genes differentially expressed between gingival (GIN) and alveolar (ALV) mucosa, related to extracellular matrix, vitamin A metabolism, and the complement system.

| **Genes** | **Primer sequences** |
| --- | --- |
| *GAPDH* | Forward 5’-ACATCGCTCAGACACCATG-3’ |
|  | Reverse 5’-TGTAGTTGAGGTCAATGAAGGG-3’ |
| *COL1A1* | Forward 5’-CCCCTGGAAAGAATGGAGATG-3’ |
|  | Reverse 5’-CATCCAAACCACTGAAACCTC-3’ |
| *COL1A2* | Forward 5’-AGGACAAGAAACACGTCTGG-3’ |
|  | Reverse 5’-GGTGATGTTCTGAGAGGCATAG-3’ |
| *COL3A1* | Forward 5’-AAGTCAAGGAGAAAGTGGTCG-3’ |
|  | Reverse 5’-CTCGTTCTCCATTCTTACCAGG-3’ |
| *COL5A1* | Forward 5’-TCGCTTACAGAGTCACCAAAG-3’ |
|  | Reverse 5’-GTTGTAGATGGAGACCAGGAAG-3’ |
| *COL5A2* | Forward 5’-AGCAAACCCATCCAGTGTAC-3’ |
|  | Reverse 5’-TGGCTGTATTAGGTGATTGGTG-3’ |
| *COL6A1* | Forward 5’-CGAATGCGAGATTTTGGACATC-3’ |
|  | Reverse 5’-ACGAAGTCCTTGGCAATCTC-3’ |
| *COL6A2* | Forward 5’-TGAAACACGAAGCCTACGG-3’ |
|  | Reverse 5’-TCTCCCTGTCTTCCCTTCTG-3’ |
| *COL6A3* | Forward 5’-CATTGGCTCTCACTGAAACAG-3’ |
|  | Reverse 5’-CCACAACCTCCATACCAGAATC-3’ |
| *COL6A6* | Forward 5’-GGTTTTAAAGGCAGTGAAGGC-3’ |
|  | Reverse 5’-CTCCTGTCCATTTAGTCCTCTG-3’ |
| *COL12A1* | Forward 5’-TGGTCGTGTGCAGAAATATAGG-3’ |
|  | Reverse 5’-CGGTGATAGTGTAAGGAGTGTC-3’ |
| *COL16A1* | Forward 5’-GTGACCCCTGTGAAGTGTG-3’ |
|  | Reverse 5’-TCTCCTTTGATGCCTTGGATG-3’ |
| *TIMP3* | Forward 5’-TGATGGCAAGATGTACACGG-3’ |
|  | Reverse 5’-GAAGTCACAAAGCAAGGCAG-3’ |
| *SERPINH1* | Forward 5’-CCCTTCATCTTCCTAGTGCG-3’ |
|  | Reverse 5’-GTCTCAGGAGCCTTTGGATG-3’ |
| *PCOLCE* | Forward 5’-GACACCTACTGCCGCTATG-3’ |
|  | Reverse 5’-GAGATCTGAGACGAACTGGAC-3’ |
| *FMOD* | Forward 5’-CTCTCACACGTTCTCCAACC-3’ |
|  | Reverse 5’-GTCATCTTCATACTGGGCCTG-3’ |
| *ADAMTS2* | Forward 5’-TGCACCTGGCAAGCATTGTT-3’ |
|  | Reverse 5’-GAGCCAAACGGACTCCAAGC-3’ |
| *MMP1* | Forward 5’-GCACAAATCCCTTCTACCCG-3’ |
|  | Reverse 5’-TGAACAGCCCAGTACTTATTCC-3’ |
| *MFAP4* | Forward 5’-TGTACCTCATCTACCCCTCG-3’ |
|  | Reverse 5’-CCCAGCTTGTAGTCATTCCAG-3’ |
| *ELN* | Forward 5’-CCTGGCTTCGGATTGTCTC-3’ |
|  | Reverse 5’-CAAAGGGTTTACATTCTCCACC-3’ |
| *ADH1* | Forward 5’-AGGATTTGACCTGCTTCACTC-3’ |
|  | Reverse 5’-TCCAGATCATGTAGGGTAGAGG-3’ |
| *ADH4* | Forward 5’-GCATTGAAGAGGTTGAAGTAGC-3’ |
|  | Reverse 5’-AACGATCACTGGGAAAGCTAG-3’ |
| *ALDH1A2* | Forward 5’-AAGATGTCTGGAAATGGGAGAG-3’ |
|  | Reverse 5’-GGGATCTTTACTGTCACCGTC-3’ |
| *ALDH1A3* | Forward 5’-CTTCTGCCTTAGAGTCTGGAAC-3’ |
|  | Reverse 5’-CGTATTCACCTAGTTCTCTGCC-3’ |
| *AOX1* | Forward 5’-GTCGATCCTGAAACAATGCTG-3’ |
|  | Reverse 5’-GGTGATGCCTTATCCTCTTGG-3’ |
| *CYP2C18* | Forward 5’-AATCTCAGGTTGACCCAAAGG-3’ |
|  | Reverse 5’-AGCCAAACTATCTGCCCTTC-3’ |
| *CYP3A5* | Forward 5’-AAGGAAGACTCACAGAACACAG-3’ |
|  | Reverse 5’-AAAGTCCATGTGTACGGGTC-3’ |
| *CYP26B1* | Forward 5’-CCTCAGCGTCAAGTTCTTTG-3’ |
|  | Reverse 5’-GTTTCTACCTCCCACAACCAC-3’ |
| *CFH* | Forward 5’-GATGTGTATAAGGCGGGTGAG-3’ |
|  | Reverse 5’-TTGTACTGTGGGCGGATTC-3’ |
| *C1QC* | Forward 5’-GGCTCTGACAGCGTCTTC-3’ |
|  | Reverse 5’-GAGAATGGTCTAGGCAAGGATG-3’ |
| *C1QA* | Forward 5’-AAAGGGTCACATTTACCAGGG-3’ |
|  | Reverse 5’-CCCCATTTTACAGGCGGAG-3’ |
| *C1QB* | Forward 5’-CTCACAGGACACCAGCTTC-3’ |
|  | Reverse 5’-GAGATATCGATTAGGCCCAGG-3’ |
| *C3* | Forward 5’-AACTACATCACAGAGCTGCG-3’ |
|  | Reverse 5’-AAGTCCTCAACGTTCCACAG-3’ |
| *C6* | Forward 5’-GGAAGGAGTGAATATGGAGCAG-3’ |
|  | Reverse 5’-TTCTTACCAAGTCCACGATGG-3’ |
| *C7* | Forward 5’-CAGCCTTGTGTTGGAAATGC-3’ |
|  | Reverse 5’-TCACAGTCAGAATCCCCATTG-3’ |
| *CFD* | Forward 5’-CCTGGATCGACAGCGTC-3’ |
|  | Reverse 5’-GCCTCCCCTTCTGCATATAG-3’ |
